# Supplementary material
Source: publisher figshare collection journal article supplement (https://acs.figshare.com/ndownloader/files/4344892)
Supplement: Supplementary file 1 [file 4344892]

 
data_co 
 
_audit_creation_method            SHELXL-97 
_chemical_name_systematic 
; 
 ? 
; 
_chemical_name_common             ? 
_chemical_melting_point           ? 
_chemical_formula_moiety          'C10 H22 Co3 N4 O18 P4' 
_chemical_formula_sum             'C10 H22 Co3 N4 O18 P4' 
_chemical_formula_weight          786.99 
 
loop_ 
 _atom_type_symbol 
 _atom_type_description 
 _atom_type_scat_dispersion_real 
 _atom_type_scat_dispersion_imag 
 _atom_type_scat_source 
 'C'  'C'   0.0033   0.0016 
 'International Tables Vol C Tables 4.2.6.8 and 6.1.1.4' 
 'H'  'H'   0.0000   0.0000 
 'International Tables Vol C Tables 4.2.6.8 and 6.1.1.4' 
 'N'  'N'   0.0061   0.0033 
 'International Tables Vol C Tables 4.2.6.8 and 6.1.1.4' 
 'O'  'O'   0.0106   0.0060 
 'International Tables Vol C Tables 4.2.6.8 and 6.1.1.4' 
 'P'  'P'   0.1023   0.0942 
 'International Tables Vol C Tables 4.2.6.8 and 6.1.1.4' 
 'Co'  'Co'   0.3494   0.9721 
 'International Tables Vol C Tables 4.2.6.8 and 6.1.1.4' 
 
_symmetry_cell_setting           'Monoclinic'
_symmetry_space_group_name_H-M   'C2/c'
_symmetry_space_group_name_Hall  '-C 2yc' 
 
loop_ 
 _symmetry_equiv_pos_as_xyz 
 'x, y, z' 
 '-x, y, -z+1/2' 
 'x+1/2, y+1/2, z' 
 '-x+1/2, y+1/2, -z+1/2' 
 '-x, -y, -z' 
 'x, -y, z-1/2' 
 '-x+1/2, -y+1/2, -z' 
 'x+1/2, -y+1/2, z-1/2' 
 
_cell_length_a                    12.496(3) 
_cell_length_b                    9.469(2) 
_cell_length_c                    19.485(4) 
_cell_angle_alpha                 90.00 
_cell_angle_beta                  90.14 
_cell_angle_gamma                 90.00 
_cell_volume                      2305.5(8) 
_cell_formula_units_Z             4 
_cell_measurement_temperature     293(2) 
_cell_measurement_reflns_used     1399 
_cell_measurement_theta_min       2.706 
_cell_measurement_theta_max       26.315 
 
_exptl_crystal_description        block 
_exptl_crystal_colour             blue 
_exptl_crystal_size_max           0.1 
_exptl_crystal_size_mid           0.08 
_exptl_crystal_size_min           0.06
_exptl_crystal_density_meas       ? 
_exptl_crystal_density_diffrn     2.267 
_exptl_crystal_density_method     'not measured' 
_exptl_crystal_F_000              1580 
_exptl_absorpt_coefficient_mu     2.509 
_exptl_absorpt_correction_type    'multi-scan' 
_exptl_absorpt_correction_T_min   0.786 
_exptl_absorpt_correction_T_max   0.860
_exptl_absorpt_process_details    'SADABS, Bruker(2000)' 
 
_exptl_special_details 
; 
 ? 
; 
 
_diffrn_ambient_temperature       293(2) 
_diffrn_radiation_wavelength      0.71073 
_diffrn_radiation_type            MoK\a 
_diffrn_radiation_source          'fine-focus sealed tube' 
_diffrn_radiation_monochromator   graphite 
_diffrn_measurement_device_type   'Bruker Smart Aepex CCD area detector'
_diffrn_measurement_method        'phi and omega scans'  
_diffrn_detector_area_resol_mean  ? 
_diffrn_standards_number          ? 
_diffrn_standards_interval_count  ? 
_diffrn_standards_interval_time   ? 
_diffrn_standards_decay_%         ? 
_diffrn_reflns_number             6790 
_diffrn_reflns_av_R_equivalents   0.0459 
_diffrn_reflns_av_sigmaI/netI     0.0492 
_diffrn_reflns_limit_h_min        -15 
_diffrn_reflns_limit_h_max        14 
_diffrn_reflns_limit_k_min        -9 
_diffrn_reflns_limit_k_max        11 
_diffrn_reflns_limit_l_min        -23 
_diffrn_reflns_limit_l_max        23 
_diffrn_reflns_theta_min          2.09 
_diffrn_reflns_theta_max          25.49 
_reflns_number_total              2084 
_reflns_number_gt                 1649 
_reflns_threshold_expression      >2sigma(I) 
 
_computing_data_collection      'SMART (Bruker, 2000)'
_computing_cell_refinement      'SMART'
_computing_data_reduction       'SAINT (Bruker, 2000)'
_computing_structure_solution   'SHELXTL (Bruker, 2000)'
_computing_structure_refinement 'SHELXTL'
_computing_molecular_graphics   'SHELXTL'
_computing_publication_material 'SHELXTL' 
 
_refine_special_details 
; 
 Refinement of F^2^ against ALL reflections.  The weighted R-factor wR and 
 goodness of fit S are based on F^2^, conventional R-factors R are based 
 on F, with F set to zero for negative F^2^. The threshold expression of 
 F^2^ > 2sigma(F^2^) is used only for calculating R-factors(gt) etc. and is 
 not relevant to the choice of reflections for refinement.  R-factors based 
 on F^2^ are statistically about twice as large as those based on F, and R- 
 factors based on ALL data will be even larger. 
; 
 
_refine_ls_structure_factor_coef  Fsqd  
_refine_ls_matrix_type            full 
_refine_ls_weighting_scheme       calc  
_refine_ls_weighting_details 
 'calc w=1/[\s^2^(Fo^2^)+(0.0550P)^2^+0.0000P] where P=(Fo^2^+2Fc^2^)/3' 
_atom_sites_solution_primary      direct 
_atom_sites_solution_secondary    difmap 
_atom_sites_solution_hydrogens    geom 
_refine_ls_hydrogen_treatment      constr  
_refine_ls_extinction_method      none 
_refine_ls_extinction_coef        ? 
_refine_ls_number_reflns          2084 
_refine_ls_number_parameters      178 
_refine_ls_number_restraints      0 
_refine_ls_R_factor_all           0.0515 
_refine_ls_R_factor_gt            0.0363 
_refine_ls_wR_factor_ref          0.1017 
_refine_ls_wR_factor_gt           0.0894 
_refine_ls_goodness_of_fit_ref    1.060 
_refine_ls_restrained_S_all       1.060 
_refine_ls_shift/su_max           0.001 
_refine_ls_shift/su_mean          0.000 
 
loop_ 
 _atom_site_label 
 _atom_site_type_symbol 
 _atom_site_fract_x 
 _atom_site_fract_y 
 _atom_site_fract_z 
 _atom_site_U_iso_or_equiv 
 _atom_site_adp_type 
 _atom_site_occupancy 
 _atom_site_symmetry_multiplicity 
 _atom_site_calc_flag 
 _atom_site_refinement_flags 
 _atom_site_disorder_assembly 
 _atom_site_disorder_group 
Co1 Co 0.24003(5) 0.37210(6) 0.34048(3) 0.0162(2) Uani 1 1 d . . . 
Co2 Co 0.0000 0.56674(9) 0.2500 0.0152(2) Uani 1 2 d S . . 
P1 P 0.26643(9) 0.56997(11) 0.23849(5) 0.0121(3) Uani 1 1 d . . . 
P2 P 0.14047(9) 0.59418(11) 0.10493(5) 0.0136(3) Uani 1 1 d . . . 
O1 O 0.1608(2) 0.5510(3) 0.27594(14) 0.0182(7) Uani 1 1 d . . . 
O1W O 0.1200(3) 0.4026(3) 0.40390(16) 0.0274(8) Uani 1 1 d . . . 
H1WA H 0.1308 0.4062 0.4471 0.033 Uiso 1 1 d R . . 
H1WB H 0.0557 0.3970 0.3895 0.033 Uiso 1 1 d R . . 
O2 O 0.3463(2) 0.4804(3) 0.27910(15) 0.0181(7) Uani 1 1 d . . . 
O2W O 0.0000 0.3421(5) 0.2500 0.0350(13) Uani 1 2 d S . . 
H2WA H -0.0541 0.3055 0.2302 0.042 Uiso 0.50 1 d PR . . 
H2WB H 0.0539 0.3180 0.2259 0.042 Uiso 0.50 1 d PR . . 
O3 O 0.3039(2) 0.7222(3) 0.23003(14) 0.0147(7) Uani 1 1 d . . . 
O3W O 0.0000 0.7862(5) 0.2500 0.0416(14) Uani 1 2 d S . . 
H3WA H 0.0391 0.8094 0.2159 0.050 Uiso 0.50 1 d PR . . 
H3WB H -0.0607 0.8237 0.2418 0.050 Uiso 0.50 1 d PR . . 
O4 O 0.0401(2) 0.5647(3) 0.14669(14) 0.0185(7) Uani 1 1 d . . . 
O5 O 0.1699(2) 0.7504(3) 0.10262(15) 0.0198(7) Uani 1 1 d . . . 
O6 O 0.1332(2) 0.5289(3) 0.03390(14) 0.0196(7) Uani 1 1 d . . . 
O7 O 0.2257(3) 0.3552(3) 0.14875(15) 0.0217(7) Uani 1 1 d . . . 
H7A H 0.2184 0.3263 0.1881 0.032 Uiso 1 1 calc R . . 
N1 N 0.3747(3) 0.4331(4) 0.05417(19) 0.0177(8) Uani 1 1 d . . . 
N2 N 0.3893(3) 0.2487(4) -0.0107(2) 0.0283(10) Uani 1 1 d . . . 
H2A H 0.3962 0.1624 -0.0239 0.034 Uiso 1 1 calc R . . 
C1 C 0.2526(3) 0.5020(4) 0.1501(2) 0.0151(10) Uani 1 1 d . . . 
C2 C 0.3630(4) 0.5189(5) 0.1155(2) 0.0193(10) Uani 1 1 d . . . 
H2B H 0.3733 0.6174 0.1034 0.023 Uiso 1 1 calc R . . 
H2C H 0.4184 0.4932 0.1481 0.023 Uiso 1 1 calc R . . 
C3 C 0.3864(4) 0.2922(5) 0.0534(2) 0.0255(11) Uani 1 1 d . . . 
H3B H 0.3917 0.2346 0.0919 0.031 Uiso 1 1 calc R . . 
C4 C 0.3796(4) 0.3636(5) -0.0530(2) 0.0293(12) Uani 1 1 d . . . 
H4A H 0.3796 0.3624 -0.1007 0.035 Uiso 1 1 calc R . . 
C5 C 0.3700(4) 0.4788(5) -0.0127(2) 0.0236(11) Uani 1 1 d . . . 
H5B H 0.3619 0.5716 -0.0274 0.028 Uiso 1 1 calc R . . 
 
loop_ 
 _atom_site_aniso_label 
 _atom_site_aniso_U_11 
 _atom_site_aniso_U_22 
 _atom_site_aniso_U_33 
 _atom_site_aniso_U_23 
 _atom_site_aniso_U_13 
 _atom_site_aniso_U_12 
Co1 0.0180(4) 0.0137(3) 0.0170(3) 0.0004(2) 0.0004(3) 0.0019(3) 
Co2 0.0111(5) 0.0174(5) 0.0171(4) 0.000 0.0011(3) 0.000 
P1 0.0133(6) 0.0101(6) 0.0127(5) -0.0001(4) -0.0006(5) -0.0002(5) 
P2 0.0155(6) 0.0128(6) 0.0126(5) 0.0000(4) -0.0019(5) -0.0004(5) 
O1 0.0169(17) 0.0231(17) 0.0146(15) -0.0022(12) -0.0022(13) -0.0037(13) 
O1W 0.026(2) 0.043(2) 0.0137(15) 0.0016(14) -0.0029(14) 0.0105(16) 
O2 0.0206(18) 0.0141(16) 0.0195(15) 0.0034(13) -0.0034(14) 0.0015(13) 
O2W 0.018(3) 0.021(3) 0.065(4) 0.000 -0.009(3) 0.000 
O3 0.0192(17) 0.0091(14) 0.0159(15) -0.0009(12) -0.0036(13) -0.0005(13) 
O3W 0.024(3) 0.024(3) 0.077(4) 0.000 0.027(3) 0.000 
O4 0.0090(16) 0.0311(18) 0.0153(15) 0.0008(13) 0.0027(13) -0.0030(14) 
O5 0.0235(19) 0.0138(16) 0.0221(17) 0.0008(13) -0.0076(14) -0.0037(14) 
O6 0.0238(19) 0.0195(17) 0.0156(16) -0.0012(13) -0.0010(14) -0.0005(14) 
O7 0.036(2) 0.0106(16) 0.0185(16) 0.0014(12) -0.0042(14) -0.0033(14) 
N1 0.018(2) 0.0126(19) 0.023(2) -0.0008(15) 0.0025(17) 0.0026(16) 
N2 0.036(3) 0.017(2) 0.032(2) -0.0098(18) 0.009(2) -0.0020(19) 
C1 0.019(3) 0.010(2) 0.016(2) 0.0012(17) 0.0000(19) -0.0025(18) 
C2 0.017(3) 0.020(2) 0.020(2) -0.0051(19) 0.002(2) 0.000(2) 
C3 0.024(3) 0.024(3) 0.029(3) 0.004(2) 0.006(2) 0.004(2) 
C4 0.038(3) 0.033(3) 0.018(2) -0.003(2) -0.005(2) -0.006(2) 
C5 0.027(3) 0.020(3) 0.024(3) 0.001(2) -0.003(2) -0.003(2) 
 
_geom_special_details 
; 
 All esds (except the esd in the dihedral angle between two l.s. planes) 
 are estimated using the full covariance matrix.  The cell esds are taken 
 into account individually in the estimation of esds in distances, angles 
 and torsion angles; correlations between esds in cell parameters are only 
 used when they are defined by crystal symmetry.  An approximate (isotropic) 
 treatment of cell esds is used for estimating esds involving l.s. planes. 
; 
 
loop_ 
 _geom_bond_atom_site_label_1 
 _geom_bond_atom_site_label_2 
 _geom_bond_distance 
 _geom_bond_site_symmetry_2 
 _geom_bond_publ_flag 
Co1 O5 1.954(3) 4_545 ? 
Co1 O1W 1.967(4) . ? 
Co1 O3 2.050(3) 4_545 ? 
Co1 O2 2.063(3) . ? 
Co1 O1 2.329(3) . ? 
Co2 O3W 2.078(5) . ? 
Co2 O1 2.076(3) 2 ? 
Co2 O1 2.076(3) . ? 
Co2 O4 2.075(3) . ? 
Co2 O4 2.075(3) 2 ? 
Co2 O2W 2.127(4) . ? 
P1 O1 1.521(3) . ? 
P1 O3 1.524(3) . ? 
P1 O2 1.529(3) . ? 
P1 C1 1.846(4) . ? 
P2 O6 1.518(3) . ? 
P2 O4 1.523(3) . ? 
P2 O5 1.525(3) . ? 
P2 C1 1.869(4) . ? 
O1W H1WA 0.8530 . ? 
O1W H1WB 0.8521 . ? 
O2W H2WA 0.8519 . ? 
O2W H2WB 0.8536 . ? 
O3 Co1 2.050(3) 4 ? 
O3W H3WA 0.8539 . ? 
O3W H3WB 0.8521 . ? 
O5 Co1 1.954(3) 4 ? 
O7 C1 1.430(5) . ? 
O7 H7A 0.8200 . ? 
N1 C3 1.343(6) . ? 
N1 C5 1.374(6) . ? 
N1 C2 1.452(5) . ? 
N2 C3 1.316(6) . ? 
N2 C4 1.370(6) . ? 
N2 H2A 0.8600 . ? 
C1 C2 1.546(6) . ? 
C2 H2B 0.9700 . ? 
C2 H2C 0.9700 . ? 
C3 H3B 0.9300 . ? 
C4 C5 1.350(6) . ? 
C4 H4A 0.9300 . ? 
C5 H5B 0.9300 . ? 
 
loop_ 
 _geom_angle_atom_site_label_1 
 _geom_angle_atom_site_label_2 
 _geom_angle_atom_site_label_3 
 _geom_angle 
 _geom_angle_site_symmetry_1 
 _geom_angle_site_symmetry_3 
 _geom_angle_publ_flag 
O5 Co1 O1W 99.75(13) 4_545 . ? 
O5 Co1 O3 97.17(12) 4_545 4_545 ? 
O1W Co1 O3 108.62(13) . 4_545 ? 
O5 Co1 O2 104.55(13) 4_545 . ? 
O1W Co1 O2 141.67(13) . . ? 
O3 Co1 O2 97.33(12) 4_545 . ? 
O5 Co1 O1 168.18(11) 4_545 . ? 
O1W Co1 O1 84.75(12) . . ? 
O3 Co1 O1 91.65(10) 4_545 . ? 
O2 Co1 O1 66.36(11) . . ? 
O3W Co2 O1 94.12(8) . 2 ? 
O3W Co2 O1 94.12(8) . . ? 
O1 Co2 O1 171.76(17) 2 . ? 
O3W Co2 O4 90.54(9) . . ? 
O1 Co2 O4 89.93(11) 2 . ? 
O1 Co2 O4 90.00(11) . . ? 
O3W Co2 O4 90.54(9) . 2 ? 
O1 Co2 O4 90.00(11) 2 2 ? 
O1 Co2 O4 89.93(11) . 2 ? 
O4 Co2 O4 178.92(17) . 2 ? 
O3W Co2 O2W 180.000(1) . . ? 
O1 Co2 O2W 85.88(8) 2 . ? 
O1 Co2 O2W 85.88(8) . . ? 
O4 Co2 O2W 89.46(9) . . ? 
O4 Co2 O2W 89.46(9) 2 . ? 
O1 P1 O3 115.53(17) . . ? 
O1 P1 O2 104.65(17) . . ? 
O3 P1 O2 112.32(16) . . ? 
O1 P1 C1 109.06(18) . . ? 
O3 P1 C1 104.90(17) . . ? 
O2 P1 C1 110.42(18) . . ? 
O6 P2 O4 111.38(17) . . ? 
O6 P2 O5 112.45(17) . . ? 
O4 P2 O5 113.12(18) . . ? 
O6 P2 C1 106.43(18) . . ? 
O4 P2 C1 106.25(18) . . ? 
O5 P2 C1 106.66(17) . . ? 
P1 O1 Co2 135.70(17) . . ? 
P1 O1 Co1 88.64(14) . . ? 
Co2 O1 Co1 126.43(14) . . ? 
Co1 O1W H1WA 120.4 . . ? 
Co1 O1W H1WB 120.2 . . ? 
H1WA O1W H1WB 118.3 . . ? 
P1 O2 Co1 98.92(16) . . ? 
Co2 O2W H2WA 114.0 . . ? 
Co2 O2W H2WB 105.5 . . ? 
H2WA O2W H2WB 105.5 . . ? 
P1 O3 Co1 130.19(16) . 4 ? 
Co2 O3W H3WA 104.9 . . ? 
Co2 O3W H3WB 114.6 . . ? 
H3WA O3W H3WB 105.0 . . ? 
P2 O4 Co2 135.84(17) . . ? 
P2 O5 Co1 133.94(17) . 4 ? 
C1 O7 H7A 109.5 . . ? 
C3 N1 C5 107.9(4) . . ? 
C3 N1 C2 125.2(4) . . ? 
C5 N1 C2 126.8(4) . . ? 
C3 N2 C4 108.6(4) . . ? 
C3 N2 H2A 125.7 . . ? 
C4 N2 H2A 125.7 . . ? 
O7 C1 C2 107.6(3) . . ? 
O7 C1 P1 112.2(3) . . ? 
C2 C1 P1 106.8(3) . . ? 
O7 C1 P2 105.6(3) . . ? 
C2 C1 P2 114.5(3) . . ? 
P1 C1 P2 110.2(2) . . ? 
N1 C2 C1 113.1(4) . . ? 
N1 C2 H2B 109.0 . . ? 
C1 C2 H2B 109.0 . . ? 
N1 C2 H2C 109.0 . . ? 
C1 C2 H2C 109.0 . . ? 
H2B C2 H2C 107.8 . . ? 
N2 C3 N1 109.0(4) . . ? 
N2 C3 H3B 125.5 . . ? 
N1 C3 H3B 125.5 . . ? 
C5 C4 N2 107.5(4) . . ? 
C5 C4 H4A 126.3 . . ? 
N2 C4 H4A 126.3 . . ? 
C4 C5 N1 107.0(4) . . ? 
C4 C5 H5B 126.5 . . ? 
N1 C5 H5B 126.5 . . ? 
 
_diffrn_measured_fraction_theta_max    0.966 
_diffrn_reflns_theta_full              25.49 
_diffrn_measured_fraction_theta_full   0.966 
_refine_diff_density_max    0.569 
_refine_diff_density_min   -0.520 
_refine_diff_density_rms    0.115 
